# Supplementary material for: The Swedish version of the Anterior Cruciate Ligament Quality Of Life measure (ACL-QOL): translation and measurement properties
Source: Springer Nature journal article supplement (doi:10.1007/s11136-022-03265-1), 2022-10-13
Supplement: MOESM1 [file 23602706]

# The Swedish version of the Anterior Cruciate Ligament Quality of Life Measure (ACL-QOL): translation and measurement properties

S.R Filbay, H Tigerstrand Grevnerts, S Sonesson, H Hedevik, J Kvist

## Online Resource 1. The Swedish Version of the ACLQOL

### Bedömning av livskvalitet hos personer med främre korsbandsskada.

Datum: \_\_\_\_\_ Personnummer: \_\_\_\_\_

Namn: \_\_\_\_\_

**Instruktioner:** Detta formulär innehåller frågor om hur ditt skadade knä påverkar din livskvalitet. Besvara varje fråga genom att sätta ett kryss på linjen där du tycker det stämmer överens med hur du upplever situationen.

#### Symtom och fysiska problem

1. Med tanke på din totala knäfunktion, hur stora besvär har du med att knät ger vika? Observera att denna fråga har två delar. (Om du inte har några besvär, sätt ett kryss i rutan  och gå vidare till fråga 2.)

1a. Hur mycket viker sig ditt knä?

0 \_\_\_\_\_ 100  
Knät viker sig helt Viss känsla av ostadighet

1b. Hur ofta ger ditt knä vika?

0 \_\_\_\_\_ 100  
Knät ger alltid vika Knät ger aldrig vika

2. Hur mycket smärta eller obehag får du i ditt knä i samband med längre tids aktivitet (mer än 30 min.)?

0 \_\_\_\_\_ 100  
Svår smärta Ingen smärta alls





0 \_\_\_\_\_ 100  
Extremt rädd Inte alls rädd

15. Oroar du dig för yttre förhållanden som t ex vått eller ojämnt underlag, hård bana eller typ av golv i träningslokalen när du utövar fysisk fritidsaktivitet, motion eller idrott? (Om du inte kan delta i fysisk fritidsaktivitet, motion eller idrott på grund av ditt knä, sätt ett kryss längs till vänster på linjen.)

0 \_\_\_\_\_ 100  
Extremt oroad Inte alls oroad

16. Upplever du det frustrerande att behöva tänka på ditt knä vid utövande av fysisk fritidsaktivitet, motion eller idrott?

0 \_\_\_\_\_ 100  
Extremt frustrerande Inte alls frustrerande

17. Hur svårt är det för dig att "ge allt" vid utövande av fysisk fritidsaktivitet, motion eller idrott? (Om du inte kan delta i fysisk fritidsaktivitet, motion eller idrott på grund av ditt knä, sätt ett kryss längs till vänster på linjen.)

0 \_\_\_\_\_ 100  
Extremt svårt Inte alls svårt

18. Är du rädd för att delta i kontaktdroter på grund av ditt knä? (Sätt ett kryss i rutan  om du inte deltar i kontaktdroter på grund av andra orsaker än din knäskada.)

0 \_\_\_\_\_ 100  
Extremt rädd Inte alls rädd

Följande frågor behandlar de två viktigaste fysiska fritids-, motions- eller idrottsaktiviteter som du utövar eller vill utöva. Skriv dem i rangordning.

1. \_\_\_\_\_

2. \_\_\_\_\_

19. Hur begränsad är du att utöva den fysiska fritidsaktivitet, motion eller idrott du satt som nr 1? (Om du inte kan delta i fysisk fritidsaktivitet, motion eller idrott på grund av ditt knä, sätt ett kryss längs till vänster på linjen.)

0 \_\_\_\_\_ 100  
Extremt begränsad Inte alls begränsad



## Socialt och känslomässigt

Följande frågor behandlar din attityd och dina känslor i förhållande till ditt knä.

27. Hur stort bekymmer är det för dig att du inte kan tävla i samma utsträckning nu som innan skadan? (Sätt ett kryss längst till höger om du kan tävla i samma utsträckning nu som innan skadan. Sätt ett kryss i rutan  om du inte tävlade innan knäskadan.)

0 \_\_\_\_\_ 100  
Extremt stort bekymmer Inget bekymmer alls

28. Har du haft svårigheter att hantera din knäskada känslomässigt?

0 \_\_\_\_\_ 100  
Extremt svårt Inte alls svårt

29. Hur ofta oroar du dig för ditt knä?

0 \_\_\_\_\_ 100  
Alltid Aldrig

30. Hur bekymrad är du över att inte kunna lita på ditt knä? Om du litar på ditt knä sätt ett kryss i rutan

0 \_\_\_\_\_ 100  
Mycket bekymrad Inte alls bekymrad

- 31\*. Hur begränsat är ditt sexualliv på grund av ditt knä?**

**0 \_\_\_\_\_ 100**  
**Totalt begränsat Inte begränsat alls**

32. Hur rädd är du för att skada ditt knä igen?

0 \_\_\_\_\_ 100  
Extremt rädd Inte alls rädd

**\* This is an additional item that is not in the English version of the ACL-QOL. Both the 32-item and 33-item versions have strong psychometric properties for use in ACL-injured people managed with surgical or non-surgical treatment. Therefore, clinicians**

**and researchers may select the most appropriate version to use for their patient or target population, based on age and other lifestyle factors.**
