# Supplementary material for: The Swedish version of the Anterior Cruciate Ligament Quality Of Life measure (ACL-QOL): translation and measurement properties
Source: Springer Nature journal article supplement (doi:10.1007/s11136-022-03265-1), 2022-10-13
Supplement: MOESM2 [file 23602706]

# The Swedish version of the Anterior Cruciate Ligament Quality of Life Measure (ACL-QOL): translation and measurement properties

S.R Filbay, H Tigerstrand Grevnerts, S Sonesson, H Hedevik, J Kvist

## Online Resource 2. Psychometric properties for the Swedish ACL-QOL 33-item Version (including additional item)

### Participant characteristics

Table 1. Participant characteristics

|                            | ≤ 1.5 year follow-up   |                        | 2-10 year follow-up    |                       | 15-25 year follow-up  |                       | >30 year follow-up    |                       | Total                  |                        |
|----------------------------|------------------------|------------------------|------------------------|-----------------------|-----------------------|-----------------------|-----------------------|-----------------------|------------------------|------------------------|
|                            | Surgical (n=598)       | Non-surgical (n=339)   | Surgical (n=370)       | Non-surgical (n=121)  | Surgical (n=42)       | Non-surgical (n=35)   | Surgical (n=112)      | Non-surgical (n=66)   | Surgical (n=1122)      | Non-surgical (n=561)   |
| (%) female                 | 384 (64%) <sub>0</sub> | 173 (51%) <sub>2</sub> | 197 (53%) <sub>0</sub> | 56 (46%) <sup>0</sup> | 12 (29%) <sup>0</sup> | 12 (34%) <sup>0</sup> | 29 (26%) <sub>0</sub> | 19 (29%) <sup>0</sup> | 622 (55%) <sub>0</sub> | 260 (47%) <sub>2</sub> |
| Age at follow-up (years)   | 24 (7) <sup>2</sup>    | 27 (8) <sup>5</sup>    | 27 (8) <sup>1</sup>    | 31 (9) <sup>0</sup>   | 45 (5) <sup>0</sup>   | 43 (4) <sup>0</sup>   | 59 (6) <sup>0</sup>   | 59 (7) <sup>0</sup>   | 29 (13) <sup>3</sup>   | 33 (13) <sup>5</sup>   |
| Symptoms/physical domain   | 81 (16) <sup>4</sup>   | 70 (19) <sup>0</sup>   | 78 (18) <sup>4</sup>   | 76 (20) <sup>0</sup>  | 82 (19) <sup>1</sup>  | 81 (18) <sup>1</sup>  | 78 (20) <sup>1</sup>  | 76 (20) <sup>0</sup>  | 80 (17) <sup>10</sup>  | 72 (20) <sup>1</sup>   |
| Work-related domain        | 69 (23) <sup>50</sup>  | 58 (26) <sup>11</sup>  | 72 (23) <sup>24</sup>  | 70 (25) <sup>7</sup>  | 80 (20) <sup>0</sup>  | 81 (21) <sup>3</sup>  | 74 (23) <sup>14</sup> | 77 (22) <sup>8</sup>  | 71 (23) <sup>88</sup>  | 64 (26) <sup>29</sup>  |
| Recreational/sports domain | 56 (25) <sup>8</sup>   | 39 (23) <sup>5</sup>   | 59 (24) <sup>2</sup>   | 50 (25) <sup>1</sup>  | 67 (23) <sup>0</sup>  | 60 (31) <sup>1</sup>  | 59 (28) <sup>0</sup>  | 60 (27) <sup>0</sup>  | 58 (25) <sup>10</sup>  | 45 (26) <sup>7</sup>   |
| Lifestyle domain           | 65 (23) <sup>11</sup>  | 51 (24) <sup>6</sup>   | 69 (23) <sup>3</sup>   | 66 (24) <sup>0</sup>  | 79 (20) <sup>0</sup>  | 73 (22) <sup>0</sup>  | 68 (26) <sup>1</sup>  | 70 (25) <sup>1</sup>  | 67 (24) <sup>15</sup>  | 58 (25) <sup>7</sup>   |
| Social/emotional domain    | 60 (21) <sup>11</sup>  | 52 (22) <sup>7</sup>   | 66 (22) <sup>3</sup>   | 64 (22) <sup>1</sup>  | 84 (17) <sup>0</sup>  | 78 (22) <sup>0</sup>  | 75 (23) <sup>0</sup>  | 77 (21) <sup>0</sup>  | 64 (22) <sup>14</sup>  | 59 (24) <sup>8</sup>   |
| ACL-QOL Total Score        | 64 (20) <sup>15</sup>  | 51 (20) <sup>7</sup>   | 66 (20) <sup>5</sup>   | 62 (21) <sup>1</sup>  | 76 (18) <sup>0</sup>  | 71 (23) <sup>0</sup>  | 69 (23) <sup>0</sup>  | 69 (22) <sup>0</sup>  | 65 (21) <sup>20</sup>  | 57 (22) <sup>8</sup>   |

Descriptives are count (%) or mean (standard deviation); numbers in superscript represent the number of cases with missing data

## Reliability

### *Internal consistency*

Table 2. Internal consistency for the 33-item version of the Swedish ACL-QOL

|                     | All patients   | YEARS SINCE ACL INJURY |               |              |               |
|---------------------|----------------|------------------------|---------------|--------------|---------------|
|                     |                | ≤ 1.5 years            | 2-10 years    | 15-25 years  | >30 years     |
| <b>Surgical</b>     |                |                        |               |              |               |
| Total ACL-QOL       | 0.971 (n=1057) | 0.970 (n=542)          | 0.970 (n=340) | 0.963 (n=41) | 0.980 (n=96)  |
| Social/emotional    | 0.887 (n=1148) | 0.868 (n=587)          | 0.888 (n=367) | 0.857 (n=42) | 0.915 (n=112) |
| <b>Non-surgical</b> |                |                        |               |              |               |
| Total ACL-QOL       | 0.975 (n=528)  | 0.971 (n=322)          | 0.972 (n=112) | 0.972 (n=30) | 0.977 (n=57)  |
| Social/ emotional   | 0.906 (n=562)  | 0.888 (n=332)          | 0.888 (n=120) | 0.879 (n=35) | 0.901 (n=66)  |

Data represents the Cronbach's alpha

### *Test re-test reliability and measurement error*

Table 3. Reliability of the 33-item version of the Swedish ACL-QOL administrated 1-4 weeks between test and retest

| ACL-QoL Domain       | n  | Mean difference<br>(95% CI) | SEM<br>(95% CI) | ICC (95% CI)     |
|----------------------|----|-----------------------------|-----------------|------------------|
| ACL-QoL total score  | 37 | -4.0 (-6.5 to -1.4)         | 5.4             | 0.93 (0.87-0.96) |
| Social and emotional | 37 | -5.3 (-9.6 to -0.9)         | 9.4             | 0.83 (0.70-0.91) |

## Construct validity

### *Structural validity*

Table 4. Fit indices for confirmatory factor analysis model, for the 33-item version of the Swedish ACL-QOL

| Model fit indices                                            | CFI   | RMSEA (95% CI)         | SRMR  |
|--------------------------------------------------------------|-------|------------------------|-------|
| <b>Surgical (n=1061)</b>                                     |       |                        |       |
| Model 1: 1 factor                                            | 0.792 | 0.107 (0.104 to 0.109) | 0.063 |
| Model 2A: 2 factor (Symptoms+Work, Sport+Lifestyle+SocEmo)   | 0.823 | 0.099 (0.096 to 0.101) | 0.057 |
| Model 2B: 2 factor (Symptoms+Work+Sport, Lifestyle+SocEmo)   | 0.808 | 0.103 (0.100 to 0.105) | 0.063 |
| Model 3A: 3 factor (Symptoms+Work+Sport, Lifestyle, SocEmo)  | 0.822 | 0.099 (0.097 to 0.102) | 0.062 |
| Model 3B: 3 factor (Symptoms+Work, Sport, Lifestyle+SocEmo)  | 0.843 | 0.093 (0.091 to 0.095) | 0.056 |
| Model 4A: 4 factor (Symptoms+Work, Sport, Lifestyle, SocEmo) | 0.857 | 0.089 (0.087 to 0.091) | 0.055 |
| Model 4B: 4 factor (Symptoms, Work, Sport, Lifestyle+SocEmo) | 0.847 | 0.092 (0.090 to 0.095) | 0.054 |
| Model 5: 5 factor (Symptoms, Work, Sport, Lifestyle, SocEmo) | 0.860 | 0.088 (0.086 to 0.091) | 0.053 |
| <b>Non-surgical (n=534)</b>                                  |       |                        |       |
| Model 1: 1 factor                                            | 0.830 | 0.101 (0.097 to 0.104) | 0.056 |
| Model 2A: 2 factor (Symptoms+Work, Sport+Lifestyle+SocEmo)   | 0.859 | 0.092 (0.089 to 0.095) | 0.050 |
| Model 2B: 2 factor (Symptoms+Work+Sport, Lifestyle+SocEmo)   | 0.846 | 0.096 (0.093 to 0.099) | 0.056 |
| Model 3A: 3 factor (Symptoms+Work+Sport, Lifestyle, SocEmo)  | 0.851 | 0.095 (0.091 to 0.098) | 0.056 |
| Model 3B: 3 factor (Symptoms+Work, Sport, Lifestyle+SocEmo)  | 0.883 | 0.084 (0.080 to 0.087) | 0.046 |
| Model 4A: 4 factor (Symptoms+Work, Sport, Lifestyle, SocEmo) | 0.889 | 0.082 (0.078 to 0.085) | 0.046 |
| Model 4B: 4 factor (Symptoms, Work, Sport, Lifestyle+SocEmo) | 0.888 | 0.082 (0.079 to 0.086) | 0.045 |
| Model 5: 5 factor (Symptoms, Work, Sport, Lifestyle, SocEmo) | 0.894 | 0.080 (0.077 to 0.084) | 0.044 |

CFI = comparative fit index; RMSEA = root mean square error of approximation; SRMR =

Standardized Root Mean Square Residual; A CFI close to 0.95 or higher, RMSEA close to 0.06 or

lower, and a SRMR close to 0.08 or lower, are representative of good fitting models

## Hypothesis testing

Table 5. Hypothesis testing to evaluate construct validity in the 33-item version of the Swedish ACL-QOL

| Hypothesis                                                                                                                                 | Surgical<br>(n=1163)            | Non-surgical<br>(n=570)         |
|--------------------------------------------------------------------------------------------------------------------------------------------|---------------------------------|---------------------------------|
| The ACL-QOL score should be at least moderately ( $r \geq 0.3$ ), positively correlated with the PCS SF-36 score                           | $r=0.70^{**}$<br>(0.64 to 0.76) | $r=0.71^{**}$<br>(0.63 to 0.77) |
| The ACL-QOL score should be at least moderately ( $r \geq 0.3$ ), positively correlated with the SF-36 MCS score                           | $r=0.39^{**}$<br>(0.30 to 0.49) | $r=0.33^{**}$<br>(0.15 to 0.49) |
| The ACL-QOL score should be at least moderately, positively correlated with KOOS Pain subscale scores ( $r \geq 0.30$ )                    | $r=0.70^{**}$<br>(0.67 to 0.73) | $r=0.69^{**}$<br>(0.64 to 0.73) |
| The ACL-QOL score should be at least moderately, positively correlated with KOOS Sport/Rec subscale scores ( $r \geq 0.30$ )               | $r=0.74^{**}$<br>(0.71 to 0.77) | $r=0.76^{**}$<br>(0.70 to 0.81) |
| The ACL-QOL score should be at least moderately ( $r \geq 0.30$ ), positively correlated with the EQ-5D index score                        | $r=0.63^{**}$<br>(0.56 to 0.69) | $r=0.57^{**}$<br>(0.47 to 0.65) |
| Patients who were satisfied with current knee function should report better ACL-QOL scores than those who were not (mean $\geq 10$ points) | MD=33                           | MD=34                           |
| Patients who returned to pre-injury sport should report better ACL-QOL scores than those who did not (mean $\geq 10$ points)               | MD=11                           | MD=28                           |

Results are reported as  $r$ =Pearson correlation (95% CI); MD=Mean difference;

\* Correlation ( $r$ ) / Paired-sample t-test (MD) is significant at the 0.01 level (2-tailed);

Confirmation of at least 75% of the predefined hypotheses is considered necessary to represent good construct validity; SF-36=The Optum SF™ Health Surveys SF-36; PCS=Physical Component Score; MCS=Mental Component Score; KOOS=Knee Injury and Osteoarthritis Outcome Score; EQ-5D=The EuroQol-5D

## Responsiveness

Table 6. Evaluation of responsiveness of the 33-item version of the Swedish ACL-QOL using a construct approach

| Hypothesis                                                                                                                                                                     | Surgical                                                                                           | Non-surgical                                                                                       |
|--------------------------------------------------------------------------------------------------------------------------------------------------------------------------------|----------------------------------------------------------------------------------------------------|----------------------------------------------------------------------------------------------------|
| Change (3 to 12 months post ACL surgery) in ACL-RSI score should be at least moderately positively correlated ( $r > 0.30$ ) with change in ACL-QOL score                      | $r = 0.719$<br>95% CI: 0.566 to 0.818<br>$p < .001$<br>$n = 62$                                    | $r = 0.734$<br>95% CI: 0.606 to 0.825<br>$p < .001$<br>$n = 73$                                    |
| ACL-QOL scores at 12 months post ACL surgery, should be higher (mean $\geq 1$ points) than ACL-QOL scores at 3 months post ACL surgery                                         | <u>Paired-sample t-test</u><br>Mean diff = 22.7<br>95% CI: 19.6 to 25.0<br>$p < .001$<br>$n = 107$ | <u>Paired-sample t-test</u><br>Mean diff = 13.1<br>95% CI: 10.0 to 16.1<br>$p < .001$<br>$n = 113$ |
| Change (3 to 12 months post ACL surgery) in KOOS Pain subscale score should be at least moderately positively correlated ( $r > 0.30$ ) with change in ACL-QoL score           | $r = 0.401$<br>95% CI: 0.118 to 0.624<br>$p = .007$<br>$n = 44$                                    | $r = 0.713$<br>95% CI: 0.502 to 0.844<br>$p < .001$<br>$n = 36$                                    |
| ACL-QOL scores at 6 months post ACL surgery should be higher (mean $\geq 1$ points) than ACL-QOL scores at 6 weeks post ACL surgery                                            | <u>Paired-sample t-test</u><br>Mean diff = 19.6<br>95% CI: 15.6 to 23.6<br>$p < .001$<br>$n = 40$  | N/A                                                                                                |
| Pre-operative ACL-QOL scores should be lower (mean $\geq 1$ points) than ACL-QOL scores 12 months post ACL surgery                                                             | <u>Paired-sample t-test</u><br>Mean diff = 29.9<br>95% CI: 25.7 to 34.1<br>$p < .001$<br>$n = 51$  | N/A                                                                                                |
| Change (3 to 12 months post ACL surgery) in the SF-36 Mental Component Score should be at least moderately positively correlated ( $r > 0.30$ ) with change in ACL-QOL score   | $r = 0.503$<br>95% CI: 0.222 to 0.706<br>$p = .001$<br>$n = 39$                                    | N/A                                                                                                |
| Change (3 to 12 months post ACL surgery) in the SF-36 Physical Component Score should be at least moderately positively correlated ( $r > 0.30$ ) with change in ACL-QOL score | $r = 0.628$<br>95% CI: 0.390 to 0.787<br>$p < .001$<br>$n = 39$                                    | N/A                                                                                                |
| Change (1 to 3 months post ACL injury) in IKDC should be at least moderately positively correlated ( $r > 0.30$ ) with change in ACL-QOL Lifestyle domain                      |                                                                                                    | $n=158$<br>$r=0.36^*$<br>0.21 to 0.49                                                              |
| Change (1 to 3 months post ACL injury) in IKDC should be at least moderately positively correlated ( $r > 0.30$ ) with change in ACL-QOL Social/emotional domain               |                                                                                                    | $n=157$<br>$r=0.32^*$<br>0.17 to 0.45                                                              |
| Change (1 to 12 months post ACL injury) in IKDC should be at least moderately positively correlated ( $r > 0.30$ ) with change in ACL-QOL Lifestyle domain                     |                                                                                                    | $n=78$<br>$r=0.63^*$<br>0.47 to 0.75                                                               |

Change (1 to 12 months post ACL injury) in IKDC should be at least moderately positively correlated ( $r > 0.30$ ) with change in ACL-QOL Social/emotional domain

n=79  
r=0.50\*  
0.32 to 0.65

## Interpretability

### *Floor and ceiling effects*

Table 7. Floor and ceiling effects for the 33-item Swedish ACL-QOL

|                                 |                        | Count (%) |
|---------------------------------|------------------------|-----------|
| ACL-QOL Total Score             | Lowest possible score  | 0 (0)     |
|                                 | Highest possible score | 19 (1.1)  |
| Social / Emotional Domain Score | Lowest possible score  | 4 (0.2)   |
|                                 | Highest possible score | 81 (4.7)  |
