# Supplementary material for: The Swedish version of the Anterior Cruciate Ligament Quality Of Life measure (ACL-QOL): translation and measurement properties
Source: Springer Nature journal article supplement (doi:10.1007/s11136-022-03265-1), 2022-10-13
Supplement: MOESM4 [file 23602706]

# The Swedish version of the Anterior Cruciate Ligament Quality of Life Measure (ACL-QOL): translation and measurement properties

S.R Filbay, H Tigerstrand Grevnerts, S Sonesson, H Hedevik, J Kvist

## Online Resource 4.

### Fit indices for confirmatory factor analysis with standardised factor loadings (surgical n=1163)

| Fit indices | Model 1<br>1 factor | Model 2A<br>2 factors | Model 2B<br>2 factors | Model 3A<br>3 factors | Model 3B<br>3 factors | Model 4A<br>4 factors | Model 4B<br>4 factors | Model 5<br>5 factors |
|-------------|---------------------|-----------------------|-----------------------|-----------------------|-----------------------|-----------------------|-----------------------|----------------------|
| CFI*        | 0.790               | 0.826                 | 0.806                 | 0.821                 | 0.840                 | 0.856                 | 0.843                 | 0.859                |
| RMSEA*      | 0.110               | 0.102                 | 0.106                 | 0.102                 | 0.096                 | 0.091                 | 0.095                 | 0.091                |
| 90% CI      | 0.108–0.112         | 0.099–0.104           | 0.103–0.108           | 0.099–0.104           | 0.094–0.098           | 0.089–0.094           | 0.093–0.098           | 0.089–0.093          |
| SRMR*       | 0.063               | 0.057                 | 0.063                 | 0.061                 | 0.056                 | 0.054                 | 0.055                 | 0.052                |
| Chi-square  | 6983.6              | 6014.0                | 6482.1                | 6010.2                | 5406.7                | 4912.0                | 5312.4                | 4818.2               |
| df, p-value | 464, <0.001         | 463, <0.001           | 463, <0.001           | 461, <0.001           | 461, <0.001           | 458, <0.001           | 458, <0.001           | 454, <0.001          |

#### Standardized factor loadings

|                       | Model 1<br>1 factor | Model 2A<br>2 factors | Model 2B<br>2 factors | Model 3A<br>3 factors | Model 3B<br>3 factors | Model 4A<br>4 factors | Model 4B<br>4 factors | Model 5<br>5 factors |
|-----------------------|---------------------|-----------------------|-----------------------|-----------------------|-----------------------|-----------------------|-----------------------|----------------------|
| Symptoms / Physical   | Q1a                 | 0.461                 | 0.586                 | 0.461                 | 0.462                 | 0.587                 | 0.583                 | 0.603                |
|                       | Q1b                 | 0.489                 | 0.607                 | 0.488                 | 0.488                 | 0.608                 | 0.605                 | 0.625                |
|                       | Q2                  | 0.675                 | 0.800                 | 0.676                 | 0.679                 | 0.800                 | 0.802                 | 0.814                |
|                       | Q3                  | 0.696                 | 0.809                 | 0.694                 | 0.697                 | 0.809                 | 0.810                 | 0.816                |
|                       | Q4                  | 0.665                 | 0.732                 | 0.671                 | 0.673                 | 0.731                 | 0.732                 | 0.735                |
| Work                  | Q5                  | 0.652                 | 0.759                 | 0.656                 | 0.658                 | 0.759                 | 0.760                 | 0.801                |
|                       | Q6                  | 0.576                 | 0.666                 | 0.579                 | 0.581                 | 0.665                 | 0.666                 | 0.686                |
|                       | Q7                  | 0.427                 | 0.464                 | 0.429                 | 0.429                 | 0.464                 | 0.462                 | 0.539                |
|                       | Q8                  | 0.429                 | 0.454                 | 0.425                 | 0.425                 | 0.455                 | 0.454                 | 0.527                |
| Recreational / Sports | Q9                  | 0.818                 | 0.811                 | 0.835                 | 0.836                 | 0.826                 | 0.826                 | 0.826                |
|                       | Q10                 | 0.744                 | 0.743                 | 0.747                 | 0.744                 | 0.741                 | 0.739                 | 0.741                |
|                       | Q11                 | 0.780                 | 0.782                 | 0.793                 | 0.796                 | 0.799                 | 0.801                 | 0.799                |
|                       | Q12                 | 0.732                 | 0.735                 | 0.739                 | 0.739                 | 0.743                 | 0.743                 | 0.743                |
|                       | Q13                 | 0.832                 | 0.838                 | 0.851                 | 0.851                 | 0.866                 | 0.867                 | 0.866                |
|                       | Q14                 | 0.804                 | 0.807                 | 0.817                 | 0.814                 | 0.823                 | 0.822                 | 0.823                |
|                       | Q15                 | 0.753                 | 0.753                 | 0.756                 | 0.755                 | 0.756                 | 0.755                 | 0.756                |
|                       | Q16                 | 0.814                 | 0.821                 | 0.802                 | 0.798                 | 0.808                 | 0.806                 | 0.808                |
|                       | Q17                 | 0.864                 | 0.870                 | 0.876                 | 0.877                 | 0.890                 | 0.891                 | 0.890                |
|                       | Q18                 | 0.812                 | 0.823                 | 0.821                 | 0.819                 | 0.842                 | 0.841                 | 0.842                |
| Lifestyle             | Q19                 | 0.789                 | 0.794                 | 0.793                 | 0.794                 | 0.802                 | 0.803                 | 0.802                |
|                       | Q20                 | 0.691                 | 0.690                 | 0.700                 | 0.703                 | 0.699                 | 0.701                 | 0.699                |
|                       | Q21                 | 0.674                 | 0.659                 | 0.667                 | 0.690                 | 0.668                 | 0.696                 | 0.668                |
|                       | Q22                 | 0.804                 | 0.801                 | 0.786                 | 0.814                 | 0.786                 | 0.813                 | 0.786                |
|                       | Q23                 | 0.794                 | 0.796                 | 0.825                 | 0.827                 | 0.825                 | 0.824                 | 0.825                |
|                       | Q24                 | 0.755                 | 0.748                 | 0.776                 | 0.764                 | 0.777                 | 0.768                 | 0.777                |
|                       | Q25                 | 0.833                 | 0.830                 | 0.848                 | 0.858                 | 0.848                 | 0.858                 | 0.849                |
|                       | Q26                 | 0.813                 | 0.819                 | 0.818                 | 0.832                 | 0.817                 | 0.827                 | 0.817                |
| Social / Emotional    | Q27                 | 0.722                 | 0.729                 | 0.753                 | 0.765                 | 0.753                 | 0.766                 | 0.752                |
|                       | Q28                 | 0.567                 | 0.571                 | 0.627                 | 0.686                 | 0.626                 | 0.685                 | 0.626                |
|                       | Q29                 | 0.806                 | 0.806                 | 0.847                 | 0.901                 | 0.847                 | 0.899                 | 0.847                |
|                       | Q30                 | 0.799                 | 0.801                 | 0.827                 | 0.867                 | 0.826                 | 0.867                 | 0.826                |
|                       | Q31                 | 0.799                 | 0.801                 | 0.827                 | 0.867                 | 0.826                 | 0.867                 | 0.826                |
|                       | Q32                 | 0.703                 | 0.712                 | 0.725                 | 0.780                 | 0.724                 | 0.781                 | 0.724                |

CFI = Comparative Fit Index; CI = Confidence Interval; df = degrees of freedom; Q = Question; RMSEA = Root Mean Square Error of Approximation; SRMR = Standardized Root Mean Square Residual

\* CFI ≥0.95 or RMSEA <0.06 or SRMR <0.08 represents acceptable structural validity

or

**Fit indices for confirmatory factor analysis with standardised factor loadings (Non-surgical n=570)**

| Fit indices | Model 1<br>1 factor | Model 2A<br>2 factors | Model 2B<br>2 factors | Model 3A<br>3 factors | Model 3B<br>3 factors | Model 4A<br>4 factors | Model 4B<br>4 factors | Model 5<br>5 factors |
|-------------|---------------------|-----------------------|-----------------------|-----------------------|-----------------------|-----------------------|-----------------------|----------------------|
| CFI*        | 0.838               | 0.868                 | 0.852                 | 0.858                 | 0.890                 | 0.897                 | 0.895                 | 0.902                |
| RMSEA*      | 0.100               | 0.091                 | 0.096                 | 0.095                 | 0.083                 | 0.081                 | 0.081                 | 0.079                |
| 90% CI      | 0.097–0.104         | 0.087–0.094           | 0.093–0.099           | 0.091–0.098           | 0.080–0.087           | 0.077–0.084           | 0.078–0.085           | 0.076–0.082          |
| SRMR*       | 0.056               | 0.047                 | 0.056                 | 0.055                 | 0.045                 | 0.043                 | 0.044                 | 0.042                |
| Chi-square  | 3131.1              | 2641.0                | 2898.4                | 2808.0                | 2280.9                | 2161.2                | 2191.7                | 2066.7               |
| df, p-value | 464, <0.001         | 463, <0.001           | 463, <0.001           | 461, <0.001           | 461, <0.001           | 458, <0.001           | 458, <0.001           | 454, <0.001          |

|                       |     | Standardized factor loadings |       |       |       |       |       |       |       |
|-----------------------|-----|------------------------------|-------|-------|-------|-------|-------|-------|-------|
| Symptoms / Physical   | Q1a | 0.495                        | 0.554 | 0.495 | 0.496 | 0.552 | 0.550 | 0.570 | 0.565 |
|                       | Q1b | 0.506                        | 0.606 | 0.508 | 0.509 | 0.603 | 0.600 | 0.623 | 0.617 |
|                       | Q2  | 0.629                        | 0.745 | 0.625 | 0.627 | 0.745 | 0.751 | 0.772 | 0.778 |
|                       | Q3  | 0.679                        | 0.798 | 0.669 | 0.671 | 0.801 | 0.805 | 0.824 | 0.826 |
|                       | Q4  | 0.660                        | 0.723 | 0.654 | 0.656 | 0.724 | 0.724 | 0.745 | 0.742 |
| Work                  | Q5  | 0.696                        | 0.790 | 0.693 | 0.694 | 0.788 | 0.784 | 0.829 | 0.829 |
|                       | Q6  | 0.628                        | 0.745 | 0.621 | 0.623 | 0.745 | 0.746 | 0.783 | 0.784 |
|                       | Q7  | 0.514                        | 0.597 | 0.510 | 0.510 | 0.597 | 0.594 | 0.648 | 0.648 |
|                       | Q8  | 0.502                        | 0.556 | 0.496 | 0.496 | 0.557 | 0.551 | 0.600 | 0.599 |
| Recreational / Sports | Q9  | 0.770                        | 0.765 | 0.782 | 0.782 | 0.772 | 0.772 | 0.772 | 0.772 |
|                       | Q10 | 0.713                        | 0.714 | 0.713 | 0.712 | 0.709 | 0.709 | 0.709 | 0.709 |
|                       | Q11 | 0.841                        | 0.845 | 0.849 | 0.850 | 0.854 | 0.855 | 0.854 | 0.855 |
|                       | Q12 | 0.679                        | 0.685 | 0.693 | 0.693 | 0.704 | 0.704 | 0.704 | 0.704 |
|                       | Q13 | 0.862                        | 0.866 | 0.878 | 0.878 | 0.888 | 0.888 | 0.888 | 0.888 |
|                       | Q14 | 0.876                        | 0.880 | 0.887 | 0.886 | 0.894 | 0.894 | 0.894 | 0.894 |
|                       | Q15 | 0.809                        | 0.813 | 0.819 | 0.818 | 0.826 | 0.826 | 0.826 | 0.826 |
|                       | Q16 | 0.890                        | 0.896 | 0.894 | 0.893 | 0.901 | 0.901 | 0.901 | 0.901 |
|                       | Q17 | 0.875                        | 0.881 | 0.888 | 0.888 | 0.898 | 0.898 | 0.898 | 0.898 |
|                       | Q18 | 0.815                        | 0.822 | 0.826 | 0.825 | 0.838 | 0.838 | 0.838 | 0.838 |
| Lifestyle             | Q19 | 0.821                        | 0.825 | 0.825 | 0.825 | 0.831 | 0.831 | 0.831 | 0.831 |
|                       | Q20 | 0.745                        | 0.747 | 0.742 | 0.743 | 0.741 | 0.741 | 0.741 | 0.741 |
|                       | Q21 | 0.688                        | 0.676 | 0.699 | 0.715 | 0.703 | 0.725 | 0.703 | 0.724 |
|                       | Q22 | 0.828                        | 0.822 | 0.820 | 0.840 | 0.821 | 0.840 | 0.822 | 0.840 |
|                       | Q23 | 0.811                        | 0.809 | 0.838 | 0.842 | 0.838 | 0.838 | 0.838 | 0.839 |
|                       | Q24 | 0.834                        | 0.828 | 0.844 | 0.845 | 0.846 | 0.849 | 0.846 | 0.849 |
|                       | Q25 | 0.835                        | 0.832 | 0.856 | 0.860 | 0.857 | 0.859 | 0.857 | 0.859 |
|                       | Q26 | 0.799                        | 0.802 | 0.803 | 0.810 | 0.801 | 0.801 | 0.801 | 0.800 |
|                       | Q27 | 0.776                        | 0.780 | 0.790 | 0.804 | 0.787 | 0.805 | 0.787 | 0.805 |
|                       | Q28 | 0.681                        | 0.682 | 0.724 | 0.731 | 0.722 | 0.731 | 0.722 | 0.731 |
| Social / Emotional    | Q29 | 0.845                        | 0.843 | 0.878 | 0.898 | 0.877 | 0.897 | 0.877 | 0.897 |
|                       | Q30 | 0.850                        | 0.850 | 0.862 | 0.886 | 0.862 | 0.885 | 0.862 | 0.884 |
|                       | Q31 | 0.780                        | 0.787 | 0.785 | 0.808 | 0.781 | 0.809 | 0.781 | 0.810 |
|                       | Q32 | 0.780                        | 0.787 | 0.785 | 0.808 | 0.781 | 0.809 | 0.781 | 0.810 |

CFI = Comparative Fit Index; CI = Confidence Interval; df = degrees of freedom; Q = Question; RMSEA = Root Mean Square Error of Approximation; SRMR = Standardized Root Mean Square Residual

\* CFI ≥ 0.95 or RMSEA < 0.06 or SRMR < 0.08 represents acceptable structural validity
